# Supplementary material for: A live attenuated-vaccine model confers cross-protective immunity against different species of the Leptospira genus
Source: eLife. 2021 Jan 26;10:e64166. doi: 10.7554/eLife.64166 (PMC7837694; doi:10.7554/eLife.64166)
Supplement: Figure 1—source data 1. [file elife-64166-fig1-data1.xls]

## Sheet: Blood hamster
	L1-130 WT	L1-130 WT	L1-130 WT	L1-130 fcpA- vaccine	L1-130 fcpA- vaccine	L1-130 fcpA- vaccine	L1-130 heat-killed vaccine	L1-130 heat-killed vaccine	L1-130 heat-killed vaccine
1 day	1.86	2.06	1.57	0	0	0	0	0	0
4 days	5.12	4.59	4.46035	2.20987	1.84	1.95	0	0	0
7 days				0	0	0	0	0	0
14 days				0	0	0	0	0	0
21 days				0	0	0	0	0	0

## Sheet: Kidney hamster
	L1-130 WT	L1-130 WT	L1-130 WT	L1-130 fcpA- vaccine	L1-130 fcpA- vaccine	L1-130 fcpA- vaccine	L1-130 heat-killed vaccine	L1-130 heat-killed vaccine	L1-130 heat-killed vaccine
1 day	4.39788	4.93063	5.42241	0	0	0	0	0	0
4 days	8.75	8.18982	9.1	4.89599	4.15778	4.68	0	0	0
7 days				0	0	0	0	0	0
14 days				0	0	0	0	0	0
21 days				0	0	0	0	0	0

## Sheet: Liver hamster
	L1-130 WT	L1-130 WT	L1-130 WT	L1-130 fcpA- vaccine	L1-130 fcpA- vaccine	L1-130 fcpA- vaccine	L1-130 heat-killed vaccine	L1-130 heat-killed vaccine	L1-130 heat-killed vaccine
1 day	4.28	4.18	3.91775	0	0	0	0	0	0
4 days	8.46	8.0886	7.85	3.67466	4.78287	4.05673	0	0	0
7 days				0	0	0	0	0	0
14 days				0	0	0	0	0	0
21 days				0	0	0	0	0	0

## Sheet: Brain hamster
	L1-130 WT	L1-130 WT	L1-130 WT	L1-130 fcpA- vaccine	L1-130 fcpA- vaccine	L1-130 fcpA- vaccine	L1-130 heat-killed vaccine	L1-130 heat-killed vaccine	L1-130 heat-killed vaccine
1 day	0	0	0	0	0	0	0	0	0
4 days	3.67	4.02	4.13619	0	0	0	0	0	0
7 days				0	0	0	0	0	0
14 days				0	0	0	0	0	0
21 days				0	0	0	0	0	0

## Sheet: Dissemination mouse
Days	Hours	FcpA- 10ˆ7 dose			FcpA- 10ˆ5 dose			FcpA- 10ˆ3 dose			FcpA- 10ˆ2 dose			FcpA- 10ˆ1 dose			L1-130 WT
1	24	3.33	3.56	3.26	2.87	3.3	3.3	0	0	0	0	0	0	0	0	0	5.8	5.4	5.19	5.6
4	96	3.37	3.36	3.54	3.05	2.8	2.63	0	0	0	0	0	0	0	0	0	6.09	6.09	5.91	5.86
8	192	1.79	1.59	1.59	0	0	0	0	0	0	0	0	0	0	0	0	3.95	3.56	4	4.05
13	312	0	0	0	0	0	0	0	0	0	0	0	0	0	0	0	1.87	1.61	1.4	0.91
15	360	0	0	0	0	0	0	0	0	0	0	0	0	0	0	0	0	0	0
18	432	0	0	0	0	0	0	0	0	0	0	0	0	0	0	0	0	0	0
21	504	0	0	0	0	0	0	0	0	0	0	0	0	0	0	0	0	0	0
