# Supplementary material for: A live attenuated-vaccine model confers cross-protective immunity against different species of the Leptospira genus
Source: eLife. 2021 Jan 26;10:e64166. doi: 10.7554/eLife.64166 (PMC7837694; doi:10.7554/eLife.64166)
Supplement: Figure 2—source data 1. [file elife-64166-fig2-data1.xls]

## Sheet: qPCR Hamster
L495 FcpA	L495 FcpA	L495 FcpA	L495 FcpA	L495 FcpA	L495 FcpA	L495 FcpA	L495 FcpA	L495 FcpA	L495 FcpA	L495 FcpA	L495 FcpA	L495 FcpA	L495 FcpA	L495 PBS	L495 PBS	L495 PBS	L495 PBS	L495 PBS	L495 PBS	L495 PBS	L495 PBS	L495 PBS	L495 PBS	L495 PBS	L495 PBS	L495 PBS	L495 PBS	L. borg 197 FcpA	L. borg 197 FcpA	L. borg 197 FcpA	L. borg 197 FcpA	L. borg 197 FcpA	L. borg 197 FcpA	L. borg 197 FcpA	L. borg 197 FcpA	L. borg 197 FcpA	L. borg 197 FcpA	L. borg 197 FcpA	L. borg 197 FcpA	L. borg 197 FcpA	L. borg 197 FcpA	L. borg 197 PBS	L. borg 197 PBS	L. borg 197 PBS	L. borg 197 PBS	L. borg 197 PBS	L. borg 197 PBS	L. borg 197 PBS	L. borg 197 PBS
3.86735	3.91803	3.17493	3.44091	3.73941	3.24551	2.94448	3.02036	2.45939	2.49416	3.04922	2.90309	3.88536	2.96379	7.64306	7.49527	8.72263	7.67394	7.69548	7.83251	8.265	7.64306	7.49527	8.72263	7.67394	7.69548	7.83251	8.265	4.78684	4.73608	4.77196	4.74338	4.5321	4.68196	4.67069	4.92716	4.77757	4.8607	4.74757	4.74533	4.80791	4.86787	6.75435	6.79519	6.72263	6.67394	6.64345	6.69548	6.22531	6.75435
[truncated: 62 more columns]

## Sheet: qPCR Mouse
10ˆ7	10ˆ7	10ˆ7	10ˆ7	10ˆ5	10ˆ5	10ˆ5	10ˆ5	10ˆ3	10ˆ3	10ˆ3	10ˆ3	10ˆ2	10ˆ2	10ˆ2	10ˆ2	10ˆ1	10ˆ1	10ˆ1	10ˆ1	PBS	PBS	PBS	PBS
0	0	0	0	0	0	6	6	4.6	5.3	5.9	0	6.25	5.45	6	6.45	6.75	7.15	7.4	6.8	7.65	7.38	7.6	7.47
