# Supplementary material for: A live attenuated-vaccine model confers cross-protective immunity against different species of the Leptospira genus
Source: eLife. 2021 Jan 26;10:e64166. doi: 10.7554/eLife.64166 (PMC7837694; doi:10.7554/eLife.64166)
Supplement: Figure 5—source data 1. [file elife-64166-fig5-data1.xls]

## Sheet: Humans
			121_5	110_1	103_4	122_6	109_6	104_2	111_2	104_8	109_3	111_8	104_5	105_6	113_7	121_8	113_4	105_3	112_6	114_8	114_5	112_3	111_5	123_1	121_2	110_5	122_3	113_1	114_2	110_7	103_5	103_7		121_7	110_3	103_6	122_8	109_8	104_4	111_4	105_2	109_5	112_2	104_7	105_8	114_1	122_2	113_6	105_5
			SEV2659.1	SEV2695.1	SEV2699.1	SEV2705.1	SEV2714.1	SEV2721.1	SEV2729.1	SEV2732.1	SEV2743.1	SEV2750.1	SEV2754.1	SEV2760.1	SEV2765.1	SEV2767.1	SEV2772.1	SEV2774.1	SEV2778.1	SEV2780.1	SEV2781.1	SEV2797.1	SEV2799.1	SEV2805.1	SEV2807.1	SEV2811.2	SEV2818.1	SEV2833.1	SEV2854.1	SEV2871.1	SEV2872.1	SEV2883.1		SEV2659.3	SEV2695.3	SEV2699.3	SEV2705.3	SEV2714.3	SEV2721.3	SEV2729.3	SEV2732.3	SEV2743.3	SEV2750.3	SEV2754.3	SEV2760.3	SEV2765.3	SEV2767.3	SEV2772.3	SEV2774.3
	ID		IgG	IgG	IgG	IgG	IgG	IgG	IgG	IgG	IgG	IgG	IgG	IgG	IgG	IgG	IgG	IgG	IgG	IgG	IgG	IgG	IgG	IgG	IgG	IgG	IgG	IgG	IgG	IgG	IgG	IgG		IgG	IgG	IgG	IgG	IgG	IgG	IgG	IgG	IgG	IgG	IgG	IgG	IgG	IgG	IgG	IgG
1	LIC20250		1	1	1	1	1	5165.62	1	1	10926.4	1	1	1	1	1	1	1	1031.31	3393.31	8231.06	1	1	1	1	8531.94	12537.4	3764.38	1	1	1	1		3691.44	5757.75	1	1	16207.9	2217.38	1	6597.5	28667.8	1205.81	7606.75	2378.81	9820.31	1904	16492.1	1446.5
2	CopLigAU(unique):RepeatsA7'13		4805.69	3186	1	20709.4	1013.38	2801.62	1	1	2732.38	5716.25	1	1	1	1	8239.12	104.188	2485.31	10868.3	23819.1	1	268.875	1	1692.25	5261.94	755.438	3334.38	4132.75	618.625	21.9375	157.688		20560.4	17685.8	7629.25	18129.8	16600.9	6133.38	2645.56	79.5	7862.75	16789.8	10361.8	2630.81	9898.31	28535	4783.06	1206.5
3	LIC20118		4827.69	10175	1	16370.4	1	2203.62	1	1	6639.38	1	1	1363.44	391.438	1	12641.1	2313.19	1	9621.31	15931.1	1	5589.88	3987.25	1	2160.94	1970.44	1	14788.8	2186.62	1	1		15398.4	14898.8	8468.25	5685.81	29743.9	2666.38	20180.6	17468.5	22190.8	1699.81	17663.8	4812.81	22287.3	7659	8401.06	2940.5
4	LIC10405		1	3715	1	1	1	981.625	1	1	125.375	1	1	1	1	82.875	1	1	1	5125.31	1	1	1	35.25	892.25	1	1380.44	384.375	1	1724.62	1	39.6875		261.438	3579.75	1	1	466.938	1	1	1	448.75	1	814.75	1	913.312	5034	8128.06	1
5	LIC12180		654.688	2105	1	1186.38	420.375	3264.62	1	1	1151.38	1	75.9375	1012.44	539.438	9499.88	609.125	47498.2	1505.31	5039.31	14735.1	460.375	1026.88	3615.25	2289.25	196.938	8437.44	465.375	10358.8	1	1	152.688		1906.44	1456.75	1	947.812	1621.94	3646.38	1	1	1970.75	641.812	390.75	2261.81	11258.3	27907	1	25999.5
6	LIC10215		16404.7	7257	1	55613.4	1123.38	12918.6	3681.5	2662	11445.4	1211.25	3342.94	23572.4	9442.44	1240.88	13318.1	11271.2	5212.31	15716.3	13662.1	4513.38	287.875	5985.25	4529.25	10470.9	25240.4	3710.38	10762.8	6943.62	2344.94	607.688		9199.44	1	9964.25	27890.8	29537.9	3050.38	31297.6	12648.5	21080.8	11513.8	20775.8	35162.8	50097.3	5268	22213.1	3776.5
7	LIC11845		749.688	1421	1	42.375	193.375	245.625	1	1	867.375	4473.25	1	977.438	609.438	108.875	2009.12	1064.19	925.312	1733.31	1970.06	2661.38	3845.88	12110.2	401.25	617.938	223.438	1712.38	1092.75	1481.62	259.938	28.6875		1	1143.75	1	1	1589.94	611.375	1	350.5	1062.75	9950.81	1	2146.81	576.312	1404	1	1
8	CopLigB:Repeats116,nt1541743		233.688	866	1	15168.4	1	829.625	1	1	5435.38	846.25	1	1	1	1	4116.12	1	1	8469.31	14477.1	1	392.875	1	1673.25	1562.94	1	3630.38	1	1	1	1		7744.44	12641.8	460.25	16785.8	6275.94	4651.38	5191.56	1	5671.75	10207.8	1979.75	1552.81	3093.31	11447	1	1
9	LIC10624		1	94	1	3337.38	1	12.625	1	1	195.375	1	1	1	1	1	1	1	1	1	1	1	1	1	1	1	1986.44	1	1	1	1	1		2042.44	267.75	1	553.812	1790.94	1	1	1	1293.75	1	1	1	1	508	1128.06	1
10	LIC11570		458.688	1081	1	47636.4	1	1001.62	1	1083	2259.38	290.25	1	204.438	1	592.875	2239.12	3362.19	279.312	7609.31	18662.1	1	1	20.25	1517.25	4001.94	1125.44	1429.38	882.75	1	209.938	349.688		16220.4	11584.8	9775.25	38438.8	9552.94	3133.38	2962.56	13672.5	5848.75	13547.8	2270.75	1338.81	21564.3	17726	5957.06	3012.5
11	CopLigBU(unique):RepeatsB7'12		1	3889	1	5924.38	298.375	2481.62	1	1	4805.38	2883.25	1	1	1	1	2526.12	1	984.312	6032.31	4810.06	1	1024.88	1	652.25	4963.94	4841.44	261.375	886.75	761.625	1	1		6089.44	1	1	4632.81	6452.94	9043.38	4095.56	1	7578.75	6246.81	3737.75	1200.81	1579.31	13109	243.062	1
12	LIC11389		11225.7	1413	1	26245.4	873.375	445.625	8116.5	899	1787.38	370.25	11976.9	6356.44	920.438	2092.88	10941.1	8779.19	21476.3	1877.31	9918.06	12828.4	1	4980.25	2213.25	4631.94	6576.44	3123.38	12166.8	862.625	8014.94	3272.69		16599.4	4427.75	1	6429.81	7676.94	1603.38	24752.6	4607.5	1575.75	364.812	25659.8	11175.8	2306.31	5560	8963.06	11231.5
13	LIC12544		636.688	1062	1	25071.4	677.375	1498.62	820.5	101	1661.38	823.25	1	165.438	1699.44	5013.88	3423.12	3934.19	240.312	1	19838.1	1066.38	1	227.25	1172.25	1352.94	1359.44	1413.38	697.75	1	1	265.688		6333.44	3724.75	1791.25	15325.8	7399.94	1328.38	5709.56	3523.5	3106.75	18859.8	405.75	1668.81	3563.31	14392	12198.1	4346.5
14	LIC11456		1039.69	2021	1	32073.4	1	1	637.5	290	1105.38	280.25	1	110.438	1	1	1	336.188	1	999.312	7515.06	1	1	599.25	1	1471.94	2294.44	786.375	1	1	1	268.688		1611.44	2516.75	1	21220.8	2018.94	331.375	7115.56	2960.5	670.75	4726.81	2554.75	1892.81	1	1802	1	1
15	LIC10115		1	1334	1	4689.38	197.375	856.625	1	1	2429.38	3024.25	1	1	1079.44	1	1160.12	300.188	435.312	1343.31	42403.1	766.375	491.875	556.25	1273.25	993.938	700.438	148.375	667.75	1712.62	1	4337.69		7346.44	6802.75	1	1149.81	28140.9	1543.38	14511.6	8652.5	9353.75	5025.81	4531.75	1594.81	7308.31	680	9487.06	1754.5
16	LIC12277		2939.69	408	1	1	1	1	1	1	863.375	1	1126.94	1	2280.44	1	1	1	236.312	9225.31	207.062	1	1	516.25	2835.25	782.938	463.438	779.375	1	2531.62	208.938	462.688		137.438	457.75	1	1	1	1	8964.56	1	2291.75	1	3304.75	1	6587.31	1	1	1
17	LIC11653		1	908	1	59.375	371.375	3858.62	1	1	1031.38	1	338.938	1489.44	1	6733.88	847.125	41679.2	1312.31	5378.31	13980.1	1	1401.88	3110.25	1771.25	166.938	8186.44	1	10833.8	1	497.938	236.688		1609.44	1326.75	1	1	1759.94	3446.38	1	1	1066.75	1	1228.75	930.812	11772.3	25444	1	25363.5
18	LIC11352 (ADI)		5334.69	567	1	58342.4	627.375	6497.62	1419.5	257	2888.38	17935.2	160.938	3002.44	30.4375	850.875	18252.1	4825.19	9766.31	12634.3	43759.1	2340.38	769.875	1809.25	7036.25	28318.9	17788.4	4386.38	12527.8	1556.62	326.938	2985.69		31069.4	10989.8	19038.2	60500.8	55523.9	5760.38	20487.6	11354.5	24353.8	23093.8	19377.8	16838.8	8472.31	16796	26356.1	1277.5
19	LIC12538		844.688	9262	1	21219.4	382.375	3417.62	167.5	1	981.375	4909.25	1718.94	16.4375	4451.44	324.875	2038.12	1	1008.31	1852.31	8047.06	1	1	1	1188.25	103.938	70.4375	1593.38	2458.75	1	484.938	604.688		8996.44	4909.75	67.25	5846.81	9718.94	1784.38	3762.56	19198.5	3641.75	10322.8	3807.75	1840.81	9035.31	3750	5737.06	1353.5
20	LIC20218		1	3598	1	3043.38	966.375	888.625	1	285	7075.38	412.25	344.938	415.438	7573.44	1	3042.12	362.188	80.3125	5120.31	4038.06	1076.38	1	4694.25	1126.25	2777.94	8346.44	3653.38	1530.75	1354.62	437.938	1		1801.44	3639.75	1	1853.81	11829.9	930.375	1808.56	5600.5	9923.75	1537.81	1185.75	1393.81	8711.31	1264	12156.1	460.5
21	LIC11966		1	1783	1	1	290.375	737.625	1	1	10871.4	456.25	1	1	2324.44	1	1	1640.19	1159.31	1782.31	1	1	12491.9	850.25	1	778.938	4145.44	6312.38	1	82.625	1	1		2145.44	1052.75	1	1	8682.94	1	22121.6	57.5	13254.8	1	1	1	40581.3	1	1	1
22	LIC10892		1629.69	5177	1	5671.38	590.375	368.625	1342.5	1	2153.38	50.25	85.9375	427.438	1663.44	1	11560.1	1506.19	663.312	1778.31	1437.06	2244.38	6834.88	9262.25	1993.25	2097.94	1654.44	1215.38	12025.8	3186.62	337.938	8.6875		2214.44	4300.75	1	5134.81	5490.94	701.375	4286.56	2937.5	2345.75	1006.81	1452.75	1	3373.31	1099	2519.06	1723.5
23	LIC13313		572.688	3140	1	3928.38	407.375	2818.62	1223.5	1	1463.38	437.25	1	1938.44	1486.44	2658.88	1612.12	1	667.312	3388.31	5461.06	570.375	296.875	483.25	4815.25	905.938	2647.44	2518.38	3908.75	13422.6	188.938	77.6875		988.438	1687.75	372.25	1347.81	3042.94	223.375	8389.56	2197.5	1634.75	655.812	617.75	6139.81	3198.31	5404	1233.06	1
24	LIC10502s		1	849	1	347.375	327.375	1	1	1	1813.38	1	4403.94	2099.44	448.438	1	1779.12	1	1060.31	1	1	1	1	1	1	295.938	1296.44	994.375	1054.75	1	1	211.688		1	1029.75	1	1	1537.94	1	1	1	4913.75	430.812	6588.75	6834.81	1	1	1	1
25	LIC10623		1	1066	1	1	1	1	1	1	649.375	1	1	1	1	1	2571.12	1	1	3191.31	1	379.375	1	1	278.25	495.938	1	579.375	1907.75	1	909.938	162.688		3708.44	2251.75	1	1	1462.94	1	1	273.5	768.75	54.8125	1	1	628.312	1	1	1
26	LIC20172		1	1351	1	1	1	1	1	1	660.375	300.25	1	1	1	1553.88	1	1	1	1202.31	3209.06	1	1	811.25	1	1	1	15.375	1	1	1	1		1	2281.75	1	1	505.938	429.375	174.562	1	502.75	1	1	1	1	1869	1	1
27	LIC11436		1026.69	509	1	501.375	1	514.625	1	1	2580.38	1	1	1	3882.44	1	1	1	717.312	1715.31	4997.06	1	1	295.25	2860.25	698.938	1335.44	810.375	1	1	2185.94	3104.69		828.438	1891.75	1	1	3239.94	490.375	351.562	1513.5	3503.75	1	2458.75	1	11819.3	1	1	1
28	LIC10017		1	479	1	1	1	1	1	1	2044.38	1	13851.9	1	20.4375	1	1	1	1	3231.31	1	1	1	2747.25	1115.25	1	265.438	1425.38	1	1	1	923.688		1	625.75	1	1	186.938	1	1	1	1664.75	1	18007.8	1	1	1	1	1
29	LIC11980		1	1	1	1	40.375	225.625	1	1	312.375	429.25	1	1	1	1	1	1	108.312	1098.31	78.0625	1	1	1	442.25	1	1	69.375	480.75	1	974.938	1181.69		1	487.75	1	1	963.938	1	1	649.5	696.75	1	1	1	1	7779	1	1
30	LIC10486		5706.69	4638	1	29927.4	3331.38	6360.62	995.5	1346	7174.38	1292.25	3069.94	4071.44	4832.44	1573.88	27019.1	4445.19	2386.31	7098.31	7167.06	2990.38	17.875	14699.2	11100.2	4785.94	31922.4	5197.38	24292.8	1885.62	726.938	1642.69		9599.44	3286.75	506.25	20358.8	51345.9	3121.38	16469.6	17020.5	14082.8	3698.81	15566.8	8234.81	30152.3	5032	19550.1	784.5
31	LIC10192		1	12902	1	211.375	1	1021.62	1	1	1809.38	1	1	1	3508.44	4124.88	1521.12	260.188	400.312	6951.31	2459.06	1	1	112.25	254.25	320.938	1725.44	1670.38	1260.75	1	1358.94	678.688		1	7007.75	1	1	736.938	1	1	1	2034.75	1	1	1	4981.31	3670	3176.06	1
32	LIC11955		740.688	1171	1	1	1	1	1	1	1917.38	1	1	570.438	734.438	1	2146.12	1	1	1242.31	286.062	1	1	1	3448.25	179.938	1	770.375	1161.75	1	478.938	1		1599.44	1005.75	1	1	1	1	1	1	1687.75	1	1	1	1	1	1	1
33	LIC11392		503.688	3413	1	22.375	1317.38	1	1	1	1389.38	332.25	1	1	2715.44	50.875	266.125	1	1690.31	2040.31	1743.06	334.375	1929.88	644.25	3557.25	626.938	4019.44	2436.38	1	1418.62	231.938	742.688		520.438	3464.75	1	26.8125	2487.94	269.375	107.562	223.5	1039.75	1205.81	1	1	4908.31	3015	1	1
34	LIC10053		1	768	1	1	119.375	1	1	1	486.375	1	1	1	1	1	25.125	1	1	536.312	198.062	1	1	419.25	1	1	98.4375	948.375	1	1	1	1		134.438	787.75	1	1	590.938	1	1	1	657.75	1	1	1	333.312	1	1	1
35	LIC12966		14390.7	2542	9506.75	58474.4	968.375	4231.62	2658.5	2070	3526.38	8319.25	3628.94	3546.44	3100.44	5758.88	6053.12	1850.19	1187.31	4655.31	37133.1	710.375	1869.88	4391.25	2221.25	5333.94	2379.44	16424.4	7241.75	4531.62	1178.94	36259.7		9361.44	4437.75	27757.2	60663.8	8255.94	4911.38	3225.56	14773.5	6881.75	24877.8	5147.75	6657.81	6590.31	11688	6772.06	958.5
36	LIC13392		1633.69	1632	1	1	14.375	1	1	1	710.375	1	1	1	412.438	48949.9	1318.12	1	6220.31	2287.31	1	1766.38	1102.88	1195.25	59.25	533.938	834.438	1191.38	186.75	1	1451.94	1288.69		1381.44	2222.75	539.25	1	673.938	1	1	648.5	669.75	285.812	1	1	782.312	52445	1	1
37	LIC13520		1	1	1	1	1	1	1	1	1	1	497.938	1	1	1	1	1	1	1	1	1	1	1	1	1	219.438	1	1	1	1	1		1	1	1	1	1	1	1	1	1	1	1007.75	1	1	1	1	1
38	LIC10845		785.688	1892	1	1	1	2078.62	1	1	679.375	1	1	1	1	1	1132.12	1	695.312	1	463.062	288.375	1	1	8260.25	368.938	1	1544.38	382.75	804.625	1852.94	276.688		375.438	1725.75	1	1	229.938	1311.38	1	1	852.75	1	1	1	314.312	1	1	1
39	LIC11886		1013.69	4176	1	1	364.375	1	590.5	1	1486.38	1	1	1	1	1	1833.12	1	1	1	1	1520.38	1	778.25	387.25	1433.94	1210.44	945.375	1025.75	47.625	1	1		848.438	3162.75	1	1	779.938	1	2791.56	1	1756.75	474.812	1	1	1378.31	1	1	1
40	LIC10870		1	1617	1	1622.38	101.375	660.625	783.5	257	1770.38	539.25	1	1	1494.44	567.875	4915.12	1	547.312	2065.31	506.062	473.375	201.875	295.25	282.25	980.938	1436.44	216.375	3343.75	54.625	1	53.6875		18416.4	1021.75	1	199.812	595.938	800.375	2035.56	346.5	14594.8	1273.81	1	2216.81	1078.31	6301	1050.06	1
	LIC10464LigAB:R16		16304.7	15201	1	58264.4	6266.38	14750.6	1659.5	1	29041.4	23324.2	1	5715.44	235.438	1002.88	44855.1	10643.2	8174.31	54403.3	56843.1	1	34202.9	5221.25	30219.2	13800.9	3473.44	23863.4	32465.8	17164.6	5421.94	1		57216.4	1	8973.25	59237.8	34344.9	27750.4	35011.6	6583.5	38395.8	50329.8	31932.8	27080.8	41418.3	53809	17137.1	10895.5
	LIC10464LigB:R812		16416.7	12272	1	22241.4	1267.38	11758.6	279.5	1	20708.4	32145.2	1739.94	1421.44	778.438	139.875	28436.1	5786.19	5579.31	22483.3	29395.1	1	6223.88	2486.25	9991.25	19740.9	5000.44	3021.38	11328.8	3485.62	2052.94	1651.69		45842.4	40017.8	1	19506.8	42078.9	32492.4	35619.6	4633.5	30938.8	37008.8	32143.8	20846.8	12173.3	48355	25101.1	11248.5
	LIC10464s1		13297.7	11188	1	55075.4	5840.38	12746.6	7019.5	1	22983.4	12564.2	236.938	5231.44	1	408.875	35550.1	7685.19	5575.31	51853.3	59276.1	1	26864.9	2938.25	29216.2	22276.9	2194.44	16849.4	26233.8	8958.62	2174.94	223.688		47718.4	35080.8	5331.25	50493.8	37926.9	24935.4	27294.6	8035.5	29009.8	41176.8	25165.8	21773.8	24663.3	52210	15272.1	8738.5
	LIC10464s2		3064.69	3839	1	14897.4	1864.38	3752.62	1410.5	1	3566.38	4086.25	4133.94	1	197.438	1	9087.12	709.188	1334.31	27999.3	6508.06	1	1	1	3007.25	11270.9	4371.44	1048.38	4104.75	1314.62	431.938	140.688		20186.4	18808.8	1	13451.8	15101.9	14737.4	18024.6	445.5	10355.8	13643.8	13580.8	7805.81	4106.31	24870	4042.06	2929.5
	LIC10464s2.1		1389.69	6471	1	14821.4	630.375	7200.62	1	1	16788.4	11727.2	1	1	1344.44	1	18088.1	402.188	2698.31	17470.3	16113.1	978.375	2433.88	272.25	2961.25	9934.94	9981.44	1221.38	8958.75	1269.62	477.938	1		25248.4	26266.8	1	12946.8	17557.9	20202.4	1	705.5	24325.8	22497.8	14482.8	7842.81	8344.31	36525	13203.1	3430.5
	LIC10465s1		16442.7	15649	1	57331.4	5363.38	13565.6	9492.5	415	27143.4	17856.2	1	5713.44	2750.44	96.875	48001.1	8886.19	6014.31	40132.3	59050.1	1272.38	32989.9	2885.25	30245.2	20420.9	3660.44	24280.4	19321.8	11945.6	3276.94	1		50484.4	43764.8	8854.25	56404.8	41836.9	26981.4	45423.6	7930.5	35318.8	47824.8	31990.8	26076.8	41549.3	52203	18261.1	8316.5
	LIC10465s2		4524.69	2401	1	20621.4	1855.38	1453.62	2096.5	1	3578.38	4858.25	1	1	1	1	5996.12	1339.19	1698.31	33362.3	21185.1	1	860.875	1	1619.25	12091.9	3077.44	745.375	1163.75	2841.62	1	149.688		13396.4	19528.8	4338.25	17668.8	14292.9	6324.38	21818.6	1	7865.75	13306.8	4962.75	1231.81	4632.31	18586	4386.06	1
[truncated: 194 more columns]

## Sheet: aa identity
LIC ORF	L. interrogans	L. kirschneri	L. noguchii	L. alstoni	L. weilii	L. alexanderi	L. borgpetersenii	L. santarosai	L. kmetyi	L. mayottensis	L. barantonii	L. adleri	L. ellisii	L. fainei	L. broomii	L. wolffii	L. licerasiae	L. inadai	L. perolatii	L. neocaledonica	L. saintgironsiae	L. haakeii	L. hartskeerlii	L. venezuelensis	L. wolbachii	L. yanagawae	L. biflexa	L. vanthielii	L. terpstrae	L. meyeri	L. harrisiae	L. levettii	L. brenneri	L. macculloughii
LIC20250	100	93	89	59	62	62	61	59	65	59	65	60	58	38	73	41	38	63	41	46	37	39	39	39	49	51	28	49	49	48	40	39	40	39
LigA 7-13	100	90	0	56	0	0	0	0	0	0	0	0	0	0	0	0	0	0	43	45	45	45	45	45	0	0	0	0	0	0	41	32	39	35
LIC20118	100	94	89	55	76	75	75	75	58	61	29	59	38	0	0	0	49	0	43	44	28	48	62	63	0	0	0	0	0	0	28	69	69	69
LIC10405	100	98	97	94	94	90	93	93	94	90	94	92	92	73	73	68	69	72	70	69	68	68	69	67	51	53	51	51	52	51	44	44	51	44
LIC12180	100	27	29	27	29	25	36	28	27	31	39	36	36	0	0	0	0	0	40	35	36	41	35	41	0	0	0	0	0	0	41	36	36	43
LIC10215	100	97	98	97	96	96	95	96	96	97	95	94	92	80	80	80	78	80	82	77	77	77	77	75	69	70	72	69	69	69	70	69	69	70
LIC11845	100	98	97	92	92	92	92	93	93	91	93	91	91	74	75	74	77	75	78	77	77	78	77	77	60	62	60	60	60	61	61	62	62	62
LigA/B 1-6	100	92	81	68	63	64	61	65	62	59	64	56	52	0	0	0	0	0	41	43	43	65	44	44	0	0	0	0	0	0	38	28	36	42
LIC10624	100	99	99	97	91	97	97	94	97	97	97	97	97	75	75	75	75	75	71	75	75	75	75	75	64	64	64	64	64	65	64	64	64	65
LIC11570	100	98	99	93	92	91	92	93	90	93	90	89	91	78	77	77	77	76	80	80	79	81	80	80	62	63	63	62	62	63	64	65	64	65
LigB 7-12	100	93	80	48	62	64	58	62	63	58	59	55	52	0	0	0	0	0	48	48	48	48	47	48	0	0	0	0	0	0	40	44	46	44
LIC11389	100	98	97	93	91	81	92	82	83	81	92	90	93	72	71	73	71	72	72	71	71	71	71	71	58	58	58	58	58	58	58	58	58	58
LigB CT	100	89	71	67	71	70	69	72	69	70	70	68	69	0	0	0	0	0	57	59	57	58	57	58	0	0	0	0	0	0	39	38	38	37
LIC12544	100	99	99	95	94	94	94	93	94	93	94	91	93	75	74	78	76	73	74	76	75	76	77	75	62	63	63	62	62	63	62	62	63	62
LIC11456	100	98	97	93	90	91	92	93	89	85	88	87	89	58	54	48	48	54	61	64	64	64	64	64	51	49	51	51	51	53	53	52	52	53
LIC10115	100	90	90	86	82	81	85	81	83	80	89	84	83	56	56	55	53	57	56	53	52	53	52	53	43	44	45	44	45	45	67	46	67	67
LIC12277	100	90	85	54	50	50	52	57	58	55	63	53	51	0	0	0	0	0	47	33	32	39	34	33	0	0	0	0	0	0	35	39	59	39
LIC11653	100	95	94	89	86	87	87	86	89	86	89	87	83	67	66	62	66	65	60	64	64	65	65	64	46	54	53	50	50	50	90	53	49	69
LIC11352	100	100	100	98	94	89	98	98	94	89	93	94	94	71	71	69	67	71	74	67	68	67	67	67	0	0	0	0	0	0	0	0	0	46
LIC12538	100	98	98	93	91	93	92	92	91	87	91	91	90	73	74	69	71	73	73	71	71	72	71	71	64	65	65	64	64	64	64	65	64	65
LIC20218	100	98	98	91	86	87	85	86	88	87	88	86	87	56	57	55	50	57	55	50	50	49	50	49	62	63	62	62	62	62	63	62	62	62
LIC11966	100	94	90	73	84	63	0	79	59	69	60	45	44	0	0	0	0	0	29	41	33	41	39	56	0	0	0	0	0	0	39	41	47	41
LIC10892	100	97	94	83	88	88	87	88	85	89	88	86	83	35	34	69	71	34	77	70	72	72	71	72	62	65	66	66	68	62	58	65	67	66
LIC13313	100	92	91	83	78	79	76	76	75	76	76	66	65	43	42	39	41	42	39	57	40	39	40	38	31	29	30	30	28	29	30	40	33	33
LIC10502	100	74	87	0	0	0	0	0	0	0	0	63	0	0	0	0	0	0	39	45	38	34	35	31	0	0	0	0	0	0	35	39	37	29
LIC10623	100	100	99	96	97	97	96	98	95	96	95	94	96	82	83	83	84	82	81	84	83	83	83	83	72	73	73	72	72	73	73	73	73	73
LIC20172	100	82	95	84	72	72	89	89	86	89	86	81	79	0	0	0	0	0	53	57	55	56	57	57	0	0	0	0	0	0	53	53	59	59
LIC11436	100	97	95	87	82	83	81	83	83	82	83	74	71	41	41	41	42	41	42	41	42	44	41	42	31	31	32	37	31	31	38	40	38	40
LIC10017	100	89	88	74	72	69	72	72	77	74	76	43	64	32	37	36	31	37	44	37	38	37	37	37	0	0	0	0	0	0	60	30	35	56
LIC11980	100	99	97	95	95	94	93	94	93	94	93	95	87	58	58	65	64	58	68	64	66	63	66	63	56	55	57	56	59	58	62	67	63	67
LIC10486	100	98	97	94	90	93	91	90	89	93	90	85	84	57	57	61	58	57	61	61	61	62	61	61	37	36	38	36	36	37	48	43	38	43
LIC10192	100	98	97	90	88	87	87	87	87	88	87	88	87	69	70	68	67	70	67	68	67	68	67	67	54	53	53	54	54	53	52	53	52	54
LIC11955	100	90	97	94	96	96	96	96	81	96	94	92	89	79	79	77	78	75	73	77	48	48	76	48	48	48	47	48	48	48	46	63	47	63
LIC11392	100	99	99	95	98	98	98	98	97	98	97	96	96	87	87	87	85	87	87	84	84	84	85	84	79	79	79	78	79	79	78	79	78	79
LIC10053	100	91	91	87	88	89	86	89	88	88	89	85	87	59	59	58	58	58	58	59	58	48	48	43	39	40	40	38	39	38	39	45	48	45
LIC12966	100	99	99	95	95	95	97	96	89	96	91	92	93	72	72	72	73	73	78	74	72	74	73	72	0	0	0	0	0	0	48	48	48	58
LIC13392	100	99	98	95	96	96	95	95	95	95	96	94	91	73	73	77	76	73	76	74	74	75	75	75	52	52	52	51	52	52	55	55	55	55
LIC13520	100	96	95	82	79	79	81	81	78	80	82	76	73	39	39	35	36	39	57	53	57	53	53	57	29	30	30	29	29	29	62	53	48	48
LIC10845	100	94	93	88	86	86	87	87	83	87	83	84	87	62	61	64	59	62	0	39	35	37	35	39	42	41	42	42	42	43	35	30	28	44
LIC11886	100	99	98	86	0	0	0	0	80	0	66	66	0	0	0	0	0	0	67	50	56	56	61	61	0	0	0	0	0	0	67	67	53	67
LIC10870	100	75	72	72	0	0	0	0	0	0	0	0	0	0	0	0	0	0	62	58	58	58	58	58	0	0	0	0	0	0	42	41	43	43
