# Supplementary material for: A live attenuated-vaccine model confers cross-protective immunity against different species of the Leptospira genus
Source: eLife. 2021 Jan 26;10:e64166. doi: 10.7554/eLife.64166 (PMC7837694; doi:10.7554/eLife.64166)
Supplement: Supplementary file 1. [file elife-64166-supp1.docx]

**Supplementary Table 1.** *Leptospira* strains used in this study for challenge after vaccination with L1-130 *fcpA-* mutant

| **Species** | **Serovar** | **Strain** | **LD50£** | |
| --- | --- | --- | --- | --- |
| **Intraperitoneal** | **Conjunctival** |
| *L. interrogans* | Copenhageni | Fiocruz L1-130 | <10 | 2.15 x 106 |
|  | Canicola | Kito | <10 | 1.78 x 107 |
|  | Pomona | PO-06-047 | <10 | <108 |
|  | Manilae | L495 | <10 | 2.15 x 107 |
| *L. kirschneri* | Grippotyphosa | RM-52 | <103 | 5 x 107 |
| *L. borgpetersenii* | Hardjo-bovis | JB197 | 104 | <108 |
|  | Hardjo-bovis | 203* | ND | >108 |

£ Results are the average of two independent experiments

* This strain was described to cause only kidney colonization in hamsters following intraperitoneal (IP) infection 17, for that reason there was no LD50 for IP route. However, in two experiments the fatality rate was 25% after infection with 108 leptospires by conjunctival (CJ) infection
