# Supplementary material for: A live attenuated-vaccine model confers cross-protective immunity against different species of the Leptospira genus
Source: eLife. 2021 Jan 26;10:e64166. doi: 10.7554/eLife.64166 (PMC7837694; doi:10.7554/eLife.64166)
Supplement: Supplementary file 4. [file elife-64166-supp4.xlsx]

## Sheet: 154 proteins
Supplementary Table 4. Complete list of 154 protein targets identified by the proteome array as correlates of immunity for the attenuated vaccine model.
ORF ID	Product name	Gene	PsortB		TMhmm	LipoP					SignalP			COG						t-rank Hamster	BHp Hamster	BHp_sig Hamster	t-rank Mouse	BHp Mouse	BHp_sig mouse	t-rank Mouse All	BHp Mouse All	BHp_sig mouse all
			Localization	Score	Helix number	Type	Score	Margin	pos1	pos2	Probability	Position1	Position2	Score	COG id	Function	Class ID	Description	Process
LIC10215	Hypothetical protein	_	Cytoplasmic Membrane	9.46	3	-	-	-	-	-	-	-	-	299	COG4956	Integral membrane protein (PIN domain superfamily)	R	General function prediction only	Poorly characterized	67	0.00507576	1	2	0.00030303	1	6	0.000909091	1
LIC10405	Hypothetical protein	_	Outer Membrane	9.49	1	-	-	-	-	-	-	-	-	625	COG0457	FOG: TPR repeat	R	General function prediction only	Poorly characterized	39	0.00295454	1	50	0.00757576	1	9	0.00136364	1
LIC10465	Partial Ig-like repeat-containing protein	ligA 7-13	Unknown	5.87	0	SpII	9.15691	2.84814	17	18	0.669	21	20	Unknown	Unknown	Unknown	Unknown	Unknown	Unknown	4	0.00030303	1	25	0.00378788	1	12	0.00181818	1
LIC11845	Hypothetical protein	_	Unknown	2	1	-	-	-	-	-	-	-	-	304	COG0330	Membrane protease subunits, stomatin/prohibitin homologs	O	Posttranslational modification, protein turnover, chaperones	Cellular processes and signaling	132	0.0101515	1	13	0.0019697	1	5	0.000757576	1
LIC12180	Methyltransferase	_	Unknown	2	1	-	-	-	-	-	-	-	-	216	COG0500	SAM-dependent methyltransferases	RQ	General function prediction only	Poorly characterized	42	0.00318182	1	41	0.00621212	1	3	0.000454545	1
LIC20118	Hypothetical protein	_	Unknown	2	2	-	-	-	-	-	-	-	-	Unknown	Unknown	Unknown	Unknown	Unknown	Unknown	6	0.000454545	1	51	0.00772727	1	7	0.00106061	1
LIC20250	Peptidoglycan-associated cytoplasmic membrane protein	_	Outer Membrane	10	1	-	-	-	-	-	-	-	-	41	COG1360	Flagellar motor protein	MN	Cell wall/membrane/envelope biogenesis	Cellular processes and signaling	3	0.000227273	1	1	0.000151515	1	2	0.00030303	1
LIC10017	Hypothetical protein	_	Outer Membrane	9.49	1	-	-	-	-	-	-	-	-	Unknown	Unknown	Unknown	Unknown	Unknown	Unknown	71	0.00537879	1	21	0.00318182	1	42	0.00636364	0
LIC10053	Hypothetical protein	_	Unknown	2	0	-	-	-	-	-	-	-	-	300	COG0457	FOG: TPR repeat	R	General function prediction only	Poorly characterized	87	0.00659091	1	61	0.00939394	1	318	0.0245455	0
LIC10115	Hypothetical protein	_	Cytoplasmic Membrane	9.46	5	SpI	1.28966	1.49057	30	31	-	-	-	192	COG1651	Protein-disulfide isomerase	OS	Posttranslational modification, protein turnover, chaperones	Cellular processes and signaling	27	0.00204545	1	28	0.00424242	1	17	0.00257576	0
LIC10192	Hypothetical protein	_	Cytoplasmic	8.96	0	-	-	-	-	-	-	-	-	308	COG0564	Pseudouridylate synthases, 23S RNA-specific	J	Translation, ribosomal structure and biogenesis	Information storage and processing	81	0.00613636	1	23	0.00348485	1	25	0.00378788	0
LIC10464	Partial Ig-like repeat-containing protein	ligB 7-12	Unknown	5.87	1	SpII	7.17879	1.43617	17	18	0.66	21	20	Unknown	Unknown	Unknown	Unknown	Unknown	Unknown	8	0.000606061	1	5	0.000757576	1	77	0.0119697	0
LIC10486	Hypothetical protein	_	Unknown	2	1	-	-	-	-	-	-	-	-	Unknown	Unknown	Unknown	Unknown	Unknown	Unknown	80	0.00606061	1	54	0.00833333	1	81	0.0128788	0
LIC10502	Cytoplasmic membrane protein	_	Unknown	6.26	1	SpI	6.42931	2.01553	34	35	-	-	-	Unknown	Unknown	Unknown	Unknown	Unknown	Unknown	63	0.00477273	1	18	0.00272727	1	57	0.00863636	0
LIC10623	Flagellar motor protein MotB	motB	Unknown	2	1	-	-	-	-	-	-	-	-	254	COG1360	Flagellar motor protein	N	Cell motility	Cellular processes and signaling	66	0.005	1	26	0.00393939	1	62	0.00939394	0
LIC10624	Flagellar protein	fliL	Unknown	2	1	-	-	-	-	-	-	-	-	172	COG1580	Flagellar basal body-associated protein	N	Cell motility	Cellular processes and signaling	5	0.000378788	1	32	0.00484848	1	14	0.00212121	0
LIC10892	Biopolymer transport exbB-like protein	_	Cytoplasmic Membrane	10	4	SpI	16.5001	9.46812	32	33	-	-	-	208	COG0811	Biopolymer transport proteins	U	Intracellular trafficking, secretion, and vesicular transport	Cellular processes and signaling	47	0.00356061	1	39	0.00590909	1	83	0.0133333	0
LIC11352	LipL32	lipL32	Unknown	2.5	1	SpII	15.7333	2.1137	19	20	0.532	22	21	Unknown	Unknown	Unknown	Unknown	Unknown	Unknown	30	0.00227273	1	6	0.000909091	1	56	0.00848485	0
LIC11389	Flagellar protein B	flbB	Unknown	2	1	-	-	-	-	-	-	-	-	101	COG0419	ATPase involved in DNA repair	L	Replication, recombination and repair	Information storage and processing	9	0.000681818	1	22	0.00333333	1	49	0.00742424	0
LIC11392	Flagellar MS-ring protein	fliF	Unknown	6.25	2	-	-	-	-	-	-	-	-	564	COG1766	Flagellar biosynthesis/type III secretory pathway Lipoprotein	NU	Cell motility	Cellular processes and signaling	84	0.00636364	1	44	0.00666667	1	117	0.0187879	0
LIC11436	Hypothetical protein	_	Outer Membrane	9.49	1	-	-	-	-	-	-	-	-	Unknown	Unknown	Unknown	Unknown	Unknown	Unknown	69	0.00522727	1	52	0.00787879	1	16	0.00242424	0
LIC11456	LipL31	lipL31	Unknown	4.9	0	SpII	11.2888	7.65461	19	20	0.669	21	20	95	COG1196	Chromosome segregation ATPases	D	Cell cycle control, cell division, chromosome partitioning	Cellular processes and signaling	21	0.00159091	1	31	0.00469697	1	37	0.00560606	0
LIC11570	General secretory pathway protein D	gspD	Outer Membrane	10	1	-	-	-	-	-	-	-	-	531	COG1450	Type II secretory pathway, component PulD	NU	Cell motility	Cellular processes and signaling	7	0.000530303	1	48	0.00727273	1	314	0.0269697	0
LIC11653	Hypothetical protein	_	Unknown	2.5	0	SpI	7.66956	7.87047	20	21	0.808	21	20	Unknown	Unknown	Unknown	Unknown	Unknown	Unknown	29	0.00219697	1	47	0.00712121	1	21	0.00318182	0
LIC11955	Hypothetical protein	_	Cytoplasmic	8.96	0	-	-	-	-	-	-	-	-	94	COG3343	DNA-directed RNA polymerase, delta subunit	K	Transcription	Information storage and processing	83	0.00628788	1	58	0.00893939	1	33	0.005	0
LIC11966	Hypothetical protein	_	Unknown	2	0	-	-	-	-	-	-	-	-	Unknown	Unknown	Unknown	Unknown	Unknown	Unknown	46	0.00348485	1	36	0.00545454	1	158	0.0262121	0
LIC11980	Sec-independent protein translocase protein TatA	tatA	Unknown	2	1	-	-	-	-	-	-	-	-	81	COG1826	Sec-independent protein secretion pathway components	U	Intracellular trafficking, secretion, and vesicular transport	Cellular processes and signaling	74	0.00560606	1	17	0.00257576	1	100	0.0159091	0
LIC12015	Hypothetical protein	_	Unknown	2	0	SpII	3.70673	3.90764	18	19	-	-	-	Unknown	Unknown	Unknown	Unknown	Unknown	Unknown	128	0.00977273	1	20	0.0030303	1	41	0.00621212	0
LIC12277	Hypothetical protein	_	Unknown	2	1	-	-	-	-	-	-	-	-	211	COG0419	ATPase involved in DNA repair	L	Replication, recombination and repair	Information storage and processing	28	0.00212121	1	46	0.0069697	1	32	0.00484848	0
LIC12538	Preprotein translocase subunit SecD	secD	Cytoplasmic Membrane	10	6	-	-	-	-	-	-	-	-	564	COG0342	Preprotein translocase subunit SecD	U	Intracellular trafficking, secretion, and vesicular transport	Cellular processes and signaling	32	0.00242424	1	57	0.00878788	1	34	0.00515151	0
LIC12544	DNA binding protein	_	Unknown	2	1	-	-	-	-	-	-	-	-	163	COG1426	Uncharacterized protein conserved in bacteria	S	Function unknown	Poorly characterized	18	0.00136364	1	4	0.000606061	1	53	0.0080303	0
LIC12966	LipL41	lipL41	Unknown	2.5	1	SpII	10.6343	1.59914	19	20	0.893	22	21	75	COG0457	FOG: TPR repeat	R	General function prediction only	Poorly characterized	95	0.00719697	1	59	0.00909091	1	26	0.00393939	0
LIC13313	Hypothetical protein	_	Unknown	2	1	SpI	0.379438	0.580351	21	22	-	-	-	Unknown	Unknown	Unknown	Unknown	Unknown	Unknown	56	0.00424242	1	29	0.00439394	1	97	0.0154545	0
LIC13392	Polysaccharide deacetylase	_	Unknown	2.5	1	SpI	10.594	10.7949	22	23	0.684	23	22	190	COG4249	Uncharacterized protein containing caspase domain	RM	General function prediction only	Poorly characterized	101	0.00765152	1	43	0.00651515	1	111	0.0177273	0
LIC20172	Lipoprotein	_	Outer Membrane	9.83	1	SpII	11.0915	9.64027	36	37	-	-	-	Unknown	Unknown	Unknown	Unknown	Unknown	Unknown	68	0.00515151	1	35	0.00530303	1	118	0.0190909	0
LIC20218	Hypothetical protein	_	Unknown	2	1	-	-	-	-	-	-	-	-	126	COG0810	Periplasmic protein TonB, links inner and outer membranes	M	Cell wall/membrane/envelope biogenesis	Cellular processes and signaling	38	0.00287879	1	55	0.00848485	1	23	0.00348485	0
LIC10464	Partial Ig-like repeat-containing protein	ligB C-Terminal	Unknown	5.87	0	-	-	-	-	-	-	-	-	Unknown	Unknown	Unknown	Unknown	Unknown	Unknown	12	0.000909091	1	8	0.00121212	1	91	0.0145455	0
LIC10464	Partial Ig-like repeat-containing protein	ligB 1-6	Unknown	5.87	0	-	-	-	-	-	-	-	-	Unknown	Unknown	Unknown	Unknown	Unknown	Unknown	1	7.57576e-05	1	3	0.000454545	1	73	0.0113636	0
LIC10845	Hypothetical protein	_	Unknown	2	0	-	-	-	-	-	-	-	-	165	COG4856	Uncharacterized protein conserved in bacteria	S	Function unknown	Poorly characterized	53	0.00401515	1	63	0.00969697	0	13	0.0019697	1
LIC10870	Hypothetical protein	_	Unknown	2	1	SpI	4.85373	2.99239	23	24	-	-	-	Unknown	Unknown	Unknown	Unknown	Unknown	Unknown	480	0.0443182	0	14	0.00212121	1	1	0.000151515	1
LIC11886	Putative Lipoprotein	_	Unknown	2	0	SpII	11.186	7.31592	24	25	0.686	26	25	152	COG2010	Cytochrome c, mono- and diheme variants	C	Energy production and conversion	Metabolism	186	0.0156061	0	42	0.00636364	1	4	0.000606061	1
LIC10171	Hypothetical protein	_	Unknown	2	2	-	-	-	-	-	-	-	-	Unknown	Unknown	Unknown	Unknown	Unknown	Unknown	502	0.0421212	0	72	0.0112121	0	10	0.00151515	1
LIC11206	Hypothetical protein	_	Cytoplasmic Membrane	9.46	4	-	-	-	-	-	-	-	-	Unknown	Unknown	Unknown	Unknown	Unknown	Unknown	324	0.0318182	0	67	0.0104545	0	11	0.00166667	1
LIC20109	Hypothetical protein	_	Cytoplasmic Membrane	9.46	2	-	-	-	-	-	-	-	-	Unknown	Unknown	Unknown	Unknown	Unknown	Unknown	575	0.0294697	0	75	0.0116667	0	8	0.00121212	1
LIC10210	Cytochrome/quinol oxidase subunit 3	cyoC	Cytoplasmic Membrane	10	5	-	-	-	-	-	-	-	-	212	COG1845	Heme/copper-type cytochrome/quinol oxidase, subunit 3	C	Energy production and conversion	Metabolism	344	0.0345455	0	24	0.00363636	1	72	0.0110606	0
LIC10544	Outer membrane protein	_	Unknown	2	0	SpI	5.44058	5.64149	22	23	0.608	23	22	Unknown	Unknown	Unknown	Unknown	Unknown	Unknown	439	0.0484091	0	49	0.00742424	1	44	0.00666667	0
LIC10598	Hypothetical protein	_	Cytoplasmic Membrane	9.46	7	-	-	-	-	-	-	-	-	286	COG2208	Serine phosphatase RsbU, regulator of sigma subunit	KTG	Transcription	Information storage and processing	546	0.0344697	0	37	0.00560606	1	150	0.025	0
LIC10945	Hypothetical protein	_	Unknown	2	1	-	-	-	-	-	-	-	-	Unknown	Unknown	Unknown	Unknown	Unknown	Unknown	351	0.0356061	0	53	0.0080303	1	18	0.00272727	0
LIC11271	Hypothetical protein	_	Unknown	2	0	SpI	5.70187	3.20714	26	27	0.657	27	26	Unknown	Unknown	Unknown	Unknown	Unknown	Unknown	645	0.0140909	0	19	0.00287879	1	136	0.0221212	0
LIC11712	Magnesium transporter	mgtE	Cytoplasmic Membrane	10	5	-	-	-	-	-	-	-	-	444	COG2239	Mg/Co/Ni transporter MgtE (contains CBS domain)	P	Inorganic ion transport and metabolism	Metabolism	151	0.0117424	0	40	0.00606061	1	48	0.00727273	0
LIC11939	Hypothetical protein	_	Unknown	2	0	-	-	-	-	-	-	-	-	Unknown	Unknown	Unknown	Unknown	Unknown	Unknown	597	0.0255303	0	60	0.00924242	1	54	0.00818182	0
LIC12001	Succinate dehydrogenase cytochrome subunit B	sdhC	Cytoplasmic Membrane	10	5	-	-	-	-	-	-	-	-	Unknown	Unknown	Unknown	Unknown	Unknown	Unknown	328	0.0323485	0	56	0.00863636	1	133	0.0216667	0
LIC12242	Hypothetical protein	_	Unknown	2	1	-	-	-	-	-	-	-	-	Unknown	Unknown	Unknown	Unknown	Unknown	Unknown	349	0.0352273	0	34	0.00515151	1	92	0.014697	0
LIC12493	Putative Lipoprotein	_	Unknown	2	2	-	-	-	-	-	-	-	-	Unknown	Unknown	Unknown	Unknown	Unknown	Unknown	236	0.0209848	0	27	0.00409091	1	20	0.0030303	0
LIC12537	Preprotein translocase subunit SecF	secF	Cytoplasmic Membrane	10	6	SpI	4.60564	4.36774	38	39	-	-	-	309	COG0341	Preprotein translocase subunit SecF	U	Intracellular trafficking, secretion, and vesicular transport	Cellular processes and signaling	364	0.0370455	0	16	0.00242424	1	27	0.00409091	0
LIC12814	Thymidylate kinase	tmk	Cytoplasmic	8.96	0	-	-	-	-	-	-	-	-	203	COG0125	Thymidylate kinase	F	Nucleotide transport and metabolism	Metabolism	286	0.0264394	0	33	0.005	1	109	0.0172727	0
LIC13012	Hypothetical protein	_	Cytoplasmic Membrane	9.8	20	-	-	-	-	-	-	-	-	234	COG5373	Predicted membrane protein	SEGPR	Function unknown	Poorly characterized	514	0.0400758	0	10	0.00151515	1	43	0.00651515	0
LIC13479	Peptidoglycan-associated cytoplasmic membrane protein	_	Outer Membrane	10	1	-	-	-	-	-	-	-	-	129	COG2885	Outer membrane protein and related peptidoglycan-associated (lipo)proteins	M	Cell wall/membrane/envelope biogenesis	Cellular processes and signaling	195	0.0164394	0	62	0.00954545	1	61	0.00924242	0
LIC20073	Hypothetical protein	_	Cytoplasmic Membrane	9.46	4	-	-	-	-	-	-	-	-	Unknown	Unknown	Unknown	Unknown	Unknown	Unknown	412	0.045	0	45	0.00681818	1	15	0.00227273	0
LIC20214	Hypothetical protein	_	Outer Membrane	9.49	1	SpI	6.72217	6.92308	20	21	-	-	-	Unknown	Unknown	Unknown	Unknown	Unknown	Unknown	154	0.0120455	0	38	0.00575758	1	68	0.0104545	0
LIC10009	Putative Lipoprotein	_	Unknown	2.5	0	SpII	13.3798	13.5807	19	20	-	-	-	Unknown	Unknown	Unknown	Unknown	Unknown	Unknown	135	0.0103788	1	300	0.0257576	0	299	0.0354545	0
LIC10050	Peptidoglycan-associated cytoplasmic membrane protein	_	Outer Membrane	9.93	1	SpI	10.7664	8.08264	21	22	-	-	-	124	COG2885	Outer membrane protein and related peptidoglycan-associated (lipo)proteins	MNU	Cell wall/membrane/envelope biogenesis	Cellular processes and signaling	19	0.00143939	1	248	0.0421212	0	253	0.0443939	0
LIC10054	Putative Lipoprotein	rlpA	Unknown	2	0	-	-	-	-	-	-	-	-	284	COG0797	Lipoproteins	M	Cell wall/membrane/envelope biogenesis	Cellular processes and signaling	49	0.00371212	1	327	0.0130303	0	313	0.0271212	0
LIC10125	Hypothetical protein	_	Unknown	2	0	SpII	2.21219	2.4131	27	28	-	-	-	957	COG0457	FOG: TPR repeat	R	General function prediction only	Poorly characterized	23	0.00174242	1	91	0.0148485	0	135	0.0219697	0
LIC10191	Peptidoglycan associated Cytoplasmic membrane protein	_	Unknown	2.5	0	SpII	18.7081	10.3316	20	21	0.647	24	23	193	COG2885	Outer membrane protein and related peptidoglycan-associated (lipo)proteins	M	Cell wall/membrane/envelope biogenesis	Cellular processes and signaling	40	0.0030303	1	176	0.0421212	0	254	0.0443939	0
LIC10231	Hypothetical protein	_	Unknown	2	1	-	-	-	-	-	-	-	-	Unknown	Unknown	Unknown	Unknown	Unknown	Unknown	127	0.00969697	1
LIC10314	Hypothetical protein	_	Cytoplasmic Membrane	9.24	0	SpI	1.14046	1.34137	19	20	-	-	-	190	COG3064	Membrane protein involved in colicin uptake	MD	Cell wall/membrane/envelope biogenesis	Cellular processes and signaling	116	0.00878788	1	322	0.0157576	0	205	0.0359091	0
LIC10325	Hemolysin	hlyX	Outer Membrane	9.49	1	-	-	-	-	-	-	-	-	353	COG0457	FOG: TPR repeat	R	General function prediction only	Poorly characterized	62	0.00469697	1	167	0.0421212	0	238	0.0443939	0
LIC10402	Hypothetical protein	_	Cytoplasmic	8.96	1	-	-	-	-	-	-	-	-	37	COG0457	FOG: TPR repeat	R	General function prediction only	Poorly characterized	82	0.00621212	1	234	0.0421212	0	144	0.0234848	0
LIC10421	Hypothetical protein	_	Unknown	2.5	1	SpI	6.5606	6.76151	25	26	-	-	-	Unknown	Unknown	Unknown	Unknown	Unknown	Unknown	102	0.00772727	1	307	0.0233333	0	291	0.0381818	0
LIC10483	Hypothetical protein	_	Unknown	2	0	-	-	-	-	-	-	-	-	269	COG4260	Putative virion core protein (lumpy skin disease virus)	S	Function unknown	Poorly characterized	41	0.00310606	1	151	0.0290909	0	171	0.0286364	0
LIC10562	Putative Lipoprotein	_	Unknown	2	0	SpII	7.57086	1.90673	20	21	0.629	24	23	123	COG2849	Uncharacterized protein conserved in bacteria	S	Function unknown	Poorly characterized	52	0.00393939	1	127	0.0225758	0	76	0.0118182	0
LIC10589	Ammonium transporter	amt3	Cytoplasmic Membrane	10	11	-	-	-	-	-	-	-	-	411	COG0004	Ammonia permease	PNT	Inorganic ion transport and metabolism	Metabolism	24	0.00181818	1
LIC10628	Putative Lipoprotein	_	Unknown	2	1	SpII	11.1906	7.93013	22	23	-	-	-	133	COG2010	Cytochrome c, mono- and diheme variants	C	Energy production and conversion	Metabolism	93	0.00704545	1	311	0.0215152	0	175	0.0292424	0
LIC10711	Cytoplasmic membrane protein	_	Outer Membrane	9.49	0	-	-	-	-	-	-	-	-	Unknown	Unknown	Unknown	Unknown	Unknown	Unknown	33	0.0025	1	73	0.0113636	0	67	0.010303	0
LIC10754	DNA-directed RNA polymerase subunit beta	rpoC	Cytoplasmic	9.97	0	-	-	-	-	-	-	-	-	1403	COG0086	DNA-directed RNA polymerase, beta' subunit/160 kD subunit	Unknown	Transcription	Information storage and processing	96	0.00727273	1	150	0.0287879	0	140	0.0228788	0
LIC10788	Flagellar filament sheath protein	flaA-1	Unknown	2	1	SpI	4.83514	4.4457	29	30	-	-	-	Unknown	Unknown	Unknown	Unknown	Unknown	Unknown	31	0.00234848	1	255	0.0421212	0	304	0.0336364	0
LIC10812	Cytochrome c-type biogenesis precursor	ccmH	Unknown	2	2	-	-	-	-	-	-	-	-	74	COG3088	Uncharacterized protein involved in biosynthesis of c-type cytochromes	O	Posttranslational modification, protein turnover, chaperones	Cellular processes and signaling	105	0.00795455	1	132	0.0239394	0	60	0.00909091	0
LIC10844	Hypothetical protein	_	Cytoplasmic Membrane	9.16	2	-	-	-	-	-	-	-	-	260	COG1624	Uncharacterized conserved protein	S	Function unknown	Poorly characterized	51	0.00386364	1	320	0.0166667	0	178	0.029697	0
LIC10891	Hypothetical protein	_	Unknown	2	1	-	-	-	-	-	-	-	-	139	COG0848	Biopolymer transport protein	U	Intracellular trafficking, secretion, and vesicular transport	Cellular processes and signaling	77	0.00583333	1	156	0.0298485	0	88	0.0140909	0
LIC10902	Hypothetical protein	_	Unknown	2	1	-	-	-	-	-	-	-	-	Unknown	Unknown	Unknown	Unknown	Unknown	Unknown	111	0.00840909	1	313	0.02	0	122	0.019697	0
LIC11003	LipL71	lipL71	Outer Membrane	9.52	1	SpII	11.0055	6.79702	22	23	-	-	-	221	COG1340	Uncharacterized archaeal coiled-coil protein	SD	Function unknown	Poorly characterized	89	0.00674242	1	210	0.0421212	0	215	0.0443939	0
LIC11009	Hypothetical protein	_	Unknown	2.5	1	SpI	5.09659	3.12553	29	30	-	-	-	Unknown	Unknown	Unknown	Unknown	Unknown	Unknown	136	0.0104545	1
LIC11060	Hypothetical protein	_	Cytoplasmic Membrane	10	7	-	-	-	-	-	-	-	-	209	COG1808	Predicted membrane protein	S	Function unknown	Poorly characterized	109	0.00825758	1
LIC11073	Putative Lipoprotein	_	Unknown	2	2	-	-	-	-	-	-	-	-	Unknown	Unknown	Unknown	Unknown	Unknown	Unknown	73	0.0055303	1	175	0.0421212	0	229	0.0443939	0
LIC11149	Membrane metalloendopeptidase	_	Unknown	2	1	SpI	4.73708	4.64538	34	35	-	-	-	195	COG0739	Membrane proteins related to metalloendopeptidases	M	Cell wall/membrane/envelope biogenesis	Cellular processes and signaling	55	0.00416667	1	219	0.0421212	0	170	0.0284848	0
LIC11186	Putative Flagellar protein	flbC	Outer Membrane	9.49	0	-	-	-	-	-	-	-	-	435	COG0419	ATPase involved in DNA repair	L	Replication, recombination and repair	Information storage and processing	36	0.00272727	1	144	0.0268182	0	307	0.0322727	0
LIC11227	Hypothetical protein	_	Unknown	2.5	1	SpI	10.274	10.4749	25	26	-	-	-	Unknown	Unknown	Unknown	Unknown	Unknown	Unknown	64	0.00484848	1
LIC11245	Hypothetical protein	_	Cytoplasmic	8.96	1	-	-	-	-	-	-	-	-	75	COG1555	DNA uptake protein and related DNA-binding proteins	L	Replication, recombination and repair	Information storage and processing	94	0.00712121	1	181	0.0421212	0	246	0.0443939	0
LIC11296	dolichyl-phosphate mannose synthase	dpm	Cytoplasmic Membrane	9.16	3	-	-	-	-	-	-	-	-	254	COG0463	Glycosyltransferases involved in cell wall biogenesis	MR	Cell wall/membrane/envelope biogenesis	Cellular processes and signaling	134	0.010303	1
LIC11299	Putative Lipoprotein	_	Cytoplasmic	8.96	1	SpII	4.68361	1.94097	29	30	-	-	-	Unknown	Unknown	Unknown	Unknown	Unknown	Unknown	75	0.00568182	1	228	0.0421212	0	185	0.0310606	0
LIC11324	Flagellar basal body rod protein FlgG	flgG	Unknown	2	0	SpI	1.36394	1.56485	19	20	-	-	-	265	COG4786	Flagellar basal body rod protein	N	Cell motility	Cellular processes and signaling	125	0.00954545	1	279	0.0322727	0	297	0.0366667	0
LIC11370	Flagellar motor switch protein	fliN	Unknown	6.29	0	-	-	-	-	-	-	-	-	217	COG1776	Chemotaxis protein CheC, inhibitor of MCP methylation	NUT	Cell motility	Cellular processes and signaling	45	0.00340909	1	154	0.0295455	0	110	0.0174242	0
LIC11396	Cytoplasmic membrane protein	_	Cytoplasmic Membrane	9.46	4	-	-	-	-	-	-	-	-	Unknown	Unknown	Unknown	Unknown	Unknown	Unknown	106	0.0080303	1
LIC11486	Hypothetical protein	_	Unknown	2	1	SpI	6.66534	6.86625	24	25	-	-	-	113	COG0457	FOG: TPR repeat	RL	General function prediction only	Poorly characterized	120	0.00909091	1
LIC11498	Hypothetical protein	_	Unknown	5.48	0	-	-	-	-	-	-	-	-	1101	COG1196	Chromosome segregation ATPases	D	Cell cycle control, cell division, chromosome partitioning	Cellular processes and signaling	124	0.0094697	1	161	0.0321212	0	209	0.0372727	0
LIC11569	Hypothetical protein	_	Unknown	2.5	1	-	-	-	-	-	-	-	-	154	COG3031	Type II secretory pathway, component PulC	U	Intracellular trafficking, secretion, and vesicular transport	Cellular processes and signaling	57	0.00431818	1	319	0.0174242	0	129	0.0210606	0
LIC11573	General secretory pathway protein G	gspG	Unknown	2	1	-	-	-	-	-	-	-	-	148	COG2165	Type II secretory pathway, pseudopilin PulG	NU	Cell motility	Cellular processes and signaling	22	0.00166667	1	68	0.0106061	0	128	0.0209091	0
LIC11612	Hypothetical protein	_	Outer Membrane	9.49	1	SpI	0.262412	0.463325	26	27	-	-	-	Unknown	Unknown	Unknown	Unknown	Unknown	Unknown	35	0.00265152	1	85	0.0134848	0	104	0.0165152	0
LIC11623	Outer membrane protein	_	Outer Membrane	10	1	-	-	-	-	-	-	-	-	923	COG4775	Outer membrane protein/protective antigen OMA87	M	Cell wall/membrane/envelope biogenesis	Cellular processes and signaling	44	0.00333333	1	217	0.0421212	0	164	0.0275758	0
LIC11686	Hypothetical protein	_	Unknown	2	1	-	-	-	-	-	-	-	-	157	COG0613	Predicted metal-dependent phosphoesterases (PHP family)	R	General function prediction only	Poorly characterized	119	0.00901515	1
LIC11694	TonB-dependent outer membrane receptor	_	Outer Membrane	10	0	-	-	-	-	-	-	-	-	750	COG1629	Outer membrane receptor proteins, mostly Fe transport	P	Inorganic ion transport and metabolism	Metabolism	122	0.00924242	1	95	0.0156061	0	94	0.015	0
LIC11713	Motility protein B	_	Unknown	5.76	0	-	-	-	-	-	-	-	-	241	COG1360	Flagellar motor protein	N	Cell motility	Cellular processes and signaling	37	0.00280303	1	116	0.020303	0	114	0.0181818	0
LIC11753	ExoPolysaccharide production protein	_	Cytoplasmic Membrane	10	9	-	-	-	-	-	-	-	-	373	COG3307	Lipid A core - O-antigen ligase and related enzymes	M	Cell wall/membrane/envelope biogenesis	Cellular processes and signaling	100	0.00757576	1	285	0.0309091	0	305	0.0328788	0
LIC11833	Hypothetical protein	_	Cytoplasmic Membrane	9.46	3	-	-	-	-	-	-	-	-	79	COG4095	Uncharacterized conserved protein	S	Function unknown	Poorly characterized	657	0.00931818	1	103	0.0172727	0	75	0.0116667	0
LIC11846	Flagellar motor switch protein	_	Unknown	6.29	0	-	-	-	-	-	-	-	-	110	COG1886	Flagellar motor switch/type III secretory pathway protein	NUQ	Cell motility	Cellular processes and signaling	114	0.00863636	1	305	0.0236364	0	213	0.0384848	0
LIC11940	Heavy metal efflux pump	_	Unknown	2	1	SpI	0.289424	0.490337	25	26	-	-	-	324	COG0845	Membrane-fusion protein	M	Cell wall/membrane/envelope biogenesis	Cellular processes and signaling	88	0.00666667	1	121	0.0210606	0	189	0.0319697	0
LIC11941	Heavy metal efflux pump	czcC	Outer Membrane	10	1	-	-	-	-	-	-	-	-	337	COG1538	Outer membrane protein	MU	Cell wall/membrane/envelope biogenesis	Cellular processes and signaling	85	0.00643939	1	232	0.0421212	0	252	0.0443939	0
LIC11959	Hypothetical protein	_	Outer Membrane	9.52	1	SpI	2.9506	0.92564	27	28	-	-	-	Unknown	Unknown	Unknown	Unknown	Unknown	Unknown	130	0.00992424	1	109	0.0187879	0	108	0.0171212	0
LIC11972	Hypothetical protein	_	Unknown	2	0	-	-	-	-	-	-	-	-	Unknown	Unknown	Unknown	Unknown	Unknown	Unknown	50	0.00378788	1	259	0.0421212	0	270	0.0443939	0
LIC11988	Hypothetical protein	_	Unknown	2	1	-	-	-	-	-	-	-	-	Unknown	Unknown	Unknown	Unknown	Unknown	Unknown	91	0.00689394	1	178	0.0421212	0	221	0.0443939	0
LIC11990	Cytoplasmic membrane protein	_	Outer Membrane	9.49	1	-	-	-	-	-	-	-	-	484	COG0457	FOG: TPR repeat	Unknown	General function prediction only	Poorly characterized	26	0.0019697	1	102	0.0171212	0	172	0.0287879	0
LIC12075	Hypothetical protein	_	Unknown	2	0	SpI	6.47166	6.67257	22	23	0.684	23	22	Unknown	Unknown	Unknown	Unknown	Unknown	Unknown	117	0.00886364	1	99	0.0165152	0	137	0.0222727	0
LIC12084	Hypothetical protein	_	Unknown	2	1	-	-	-	-	-	-	-	-	Unknown	Unknown	Unknown	Unknown	Unknown	Unknown	72	0.00545454	1
LIC12183	Hypothetical protein	_	Unknown	2	1	-	-	-	-	-	-	-	-	Unknown	Unknown	Unknown	Unknown	Unknown	Unknown	129	0.00984849	1
LIC12219	Hypothetical protein	_	Unknown	2	2	-	-	-	-	-	-	-	-	51	COG0477	Permeases of the major facilitator superfamily	EGPR	Amino acid transport and metabolism	Metabolism	65	0.00492424	1	215	0.0421212	0	259	0.0443939	0
LIC12263	Hypothetical protein	_	Unknown	2	1	SpI	0.259654	0.460567	22	23	-	-	-	Unknown	Unknown	Unknown	Unknown	Unknown	Unknown	11	0.000833333	1	297	0.0272727	0	198	0.0342424	0
LIC12281	Hypothetical protein	_	Unknown	2	1	-	-	-	-	-	-	-	-	Unknown	Unknown	Unknown	Unknown	Unknown	Unknown	61	0.00462121	1	202	0.0421212	0	157	0.0260606	0
LIC12307	TolC superfamily outer membrane protein	_	Unknown	2	1	SpI	2.2218	2.42271	23	24	-	-	-	394	COG1538	Outer membrane protein	MU	Cell wall/membrane/envelope biogenesis	Cellular processes and signaling	98	0.00742424	1
LIC12310	Hypothetical protein	_	Cytoplasmic Membrane	9.46	4	-	-	-	-	-	-	-	-	109	COG0577	ABC-type antimicrobial peptide transport system, permease component	V	Defense mechanisms	Cellular processes and signaling	133	0.0102273	1	177	0.0421212	0	168	0.0281818	0
LIC12340	Hypothetical protein	_	Unknown	2	0	-	-	-	-	-	-	-	-	Unknown	Unknown	Unknown	Unknown	Unknown	Unknown	86	0.00651515	1	292	0.0281818	0	143	0.0233333	0
LIC12349	Hypothetical protein	_	Cytoplasmic Membrane	10	6	-	-	-	-	-	-	-	-	71	COG0810	Periplasmic protein TonB, links inner and outer membranes	M	Cell wall/membrane/envelope biogenesis	Cellular processes and signaling	99	0.0075	1
LIC12364	CagA	cagA	Outer Membrane	9.52	0	SpI	7.30105	7.50196	21	22	-	-	-	265	COG1196	Chromosome segregation ATPases	DL	Cell cycle control, cell division, chromosome partitioning	Cellular processes and signaling	79	0.00598485	1	293	0.0280303	0	161	0.0268182	0
LIC12476	Dihydrolipoamide succinyltransferase sucB	sucB	Cytoplasmic	9.26	0	-	-	-	-	-	-	-	-	421	COG0508	Pyruvate/2-oxoglutarate dehydrogenase complex, dihydrolipoamide acyltransferase (E2) component, and related enzymes	C	Energy production and conversion	Metabolism	20	0.00151515	1	197	0.0421212	0	278	0.0443939	0
LIC12479	Cytoplasmic membrane protein	_	Cytoplasmic Membrane	10	6	-	-	-	-	-	-	-	-	209	COG0705	Uncharacterized membrane protein (homolog of Drosophila rhomboid)	R	General function prediction only	Poorly characterized	70	0.00530303	1	239	0.0421212	0	176	0.0293939	0
LIC12500	Chemoreceptor (methyl-accepting chemotaxis) transmembrane protein	mcpB	Cytoplasmic Membrane	9.97	2	-	-	-	-	-	-	-	-	691	COG0840	Methyl-accepting chemotaxis protein	NT	Cell motility	Cellular processes and signaling	113	0.00856061	1	316	0.0180303	0	145	0.0236364	0
LIC12540	Hypothetical protein	yajC	Unknown	2	1	-	-	-	-	-	-	-	-	108	COG1862	Preprotein translocase subunit YajC	U	Intracellular trafficking, secretion, and vesicular transport	Cellular processes and signaling	112	0.00848485	1	179	0.0421212	0	226	0.0443939	0
LIC12631	Hemolysin	_	Unknown	2	0	SpII	1.80225	2.00316	23	24	-	-	-	Unknown	Unknown	Unknown	Unknown	Unknown	Unknown	76	0.00575758	1	119	0.0207576	0	174	0.0290909	0
LIC12632	Sphingomyelinase C 1	sph1	Outer Membrane	9.49	1	SpI	2.53084	0.20207	37	38	-	-	-	Unknown	Unknown	Unknown	Unknown	Unknown	Unknown	13	0.000984848	1	86	0.0136364	0	40	0.00606061	0
LIC12673	Hypothetical protein	_	Cytoplasmic Membrane	9.46	4	-	-	-	-	-	-	-	-	30	COG1009	NADH:ubiquinone oxidoreductase subunit 5 (chain L)/Multisubunit Na+/H+ antiporter, MnhA subunit	PC	Inorganic ion transport and metabolism	Metabolism	123	0.00939394	1
LIC12769	Hypothetical protein	_	Unknown	2	1	-	-	-	-	-	-	-	-	Unknown	Unknown	Unknown	Unknown	Unknown	Unknown	118	0.00893939	1	258	0.0421212	0	274	0.0443939	0
LIC12854	50S ribosomal protein L15	rplO	Unknown	2	0	-	-	-	-	-	-	-	-	143	COG0200	Ribosomal protein L15	J	Translation, ribosomal structure and biogenesis	Information storage and processing	58	0.00439394	1	82	0.0128788	0	50	0.00757576	0
LIC12921	Methyl-accepting chemotaxis protein	mcpA	Cytoplasmic Membrane	9.82	2	-	-	-	-	-	-	-	-	692	COG0840	Methyl-accepting chemotaxis protein	NT	Cell motility	Cellular processes and signaling	104	0.00787879	1	98	0.0163636	0	84	0.0134848	0
LIC12952	S-layer-like protein	_	Cytoplasmic Membrane	9.46	3	SpI	1.92102	2.12193	20	21	-	-	-	Unknown	Unknown	Unknown	Unknown	Unknown	Unknown	110	0.00833333	1	329	0.0101515	0	301	0.0351515	0
LIC12993	Hypothetical protein	_	Unknown	2	1	-	-	-	-	-	-	-	-	Unknown	Unknown	Unknown	Unknown	Unknown	Unknown	90	0.00681818	1	267	0.0421212	0	282	0.0443939	0
LIC13019	Hypothetical protein	_	Unknown	2	0	-	-	-	-	-	-	-	-	Unknown	Unknown	Unknown	Unknown	Unknown	Unknown	54	0.00409091	1	89	0.0145455	0	51	0.00772727	0
LIC13050	Hypothetical protein	_	Unknown	2	0	SpI	14.6117	14.8126	23	24	0.818	24	23	48	COG1409	Predicted phosphohydrolases	R	General function prediction only	Poorly characterized	78	0.00590909	1	74	0.0115152	0	58	0.00878788	0
LIC13084	Hypothetical protein	_	Unknown	2	1	SpI	2.85824	3.05915	34	35	-	-	-	98	COG0532	Translation initiation factor 2 (IF-2; GTPase)	J	Translation, ribosomal structure and biogenesis	Information storage and processing	16	0.00121212	1	207	0.0421212	0	280	0.0443939	0
LIC13200	Hypothetical protein	_	Cytoplasmic Membrane	9.46	4	-	-	-	-	-	-	-	-	Unknown	Unknown	Unknown	Unknown	Unknown	Unknown	10	0.000757576	1	204	0.0421212	0	264	0.0443939	0
LIC13203	Hypothetical protein	_	Cytoplasmic Membrane	9.46	3	-	-	-	-	-	-	-	-	Unknown	Unknown	Unknown	Unknown	Unknown	Unknown	121	0.00916667	1	245	0.0421212	0	232	0.0443939	0
LIC13214	Putative cytochrome oxidase subunit	_	Cytoplasmic Membrane	9.46	4	-	-	-	-	-	-	-	-	66	COG3125	Heme/copper-type cytochrome/quinol oxidase, subunit 4	C	Energy production and conversion	Metabolism	97	0.00734849	1
LIC13314	Hypothetical protein	_	Cytoplasmic Membrane	10	6	-	-	-	-	-	-	-	-	Unknown	Unknown	Unknown	Unknown	Unknown	Unknown	92	0.0069697	1	113	0.019697	0	101	0.0160606	0
LIC13410	Hypothetical protein	_	Unknown	2	1	SpII	2.13189	2.3328	30	31	-	-	-	Unknown	Unknown	Unknown	Unknown	Unknown	Unknown	103	0.00780303	1	278	0.0324242	0	19	0.00287879	0
LIC13427	Response regulator	_	Unknown	2	1	-	-	-	-	-	-	-	-	69	COG0784	FOG: CheY-like receiver	T	Signal transduction mechanisms	Cellular processes and signaling	131	0.01	1	105	0.0181818	0	82	0.0131818	0
LIC13451	Flagellar hook-associated protein FlgK	flgK	Unknown	2	0	-	-	-	-	-	-	-	-	636	COG1256	Flagellar hook-associated protein	N	Cell motility	Cellular processes and signaling	59	0.0044697	1	243	0.0421212	0	201	0.0348485	0
LIC13469	UDP-3-O-[3-hydroxymyristoyl] glucosamine N-acyltransferase	lpxD	Cytoplasmic	9.97	0	-	-	-	-	-	-	-	-	351	COG1044	UDP-3-O-[3-hydroxymyristoyl] glucosamine N-acyltransferase	M	Cell wall/membrane/envelope biogenesis	Cellular processes and signaling	656	0.0100758	1	147	0.0277273	0	309	0.0318182	0
LIC13488	Hypothetical protein	parB	Cytoplasmic	8.96	0	-	-	-	-	-	-	-	-	288	COG1475	Predicted transcriptional regulators	K	Transcription	Information storage and processing	138	0.0106061	1	97	0.0162121	0	321	0.0206061	0
LIC20016	Hypothetical protein	_	Cytoplasmic Membrane	9.46	3	SpI	0.407093	0.608006	29	30	-	-	-	84	COG0532	Translation initiation factor 2 (IF-2; GTPase)	J	Translation, ribosomal structure and biogenesis	Information storage and processing	107	0.00810606	1	211	0.0421212	0	237	0.0443939	0
LIC20060	Hypothetical protein	_	Cytoplasmic	8.96	0	-	-	-	-	-	-	-	-	107	COG0500	SAM-dependent methyltransferases	RQ	General function prediction only	Poorly characterized	60	0.00454546	1	224	0.0421212	0	231	0.0443939	0
LIC20077	Polysaccharide deacetylase	_	Unknown	2	1	-	-	-	-	-	-	-	-	250	COG0726	Predicted xylanase/chitin deacetylase	G	Carbohydrate transport and metabolism	Metabolism	108	0.00818182	1	76	0.0118182	0	120	0.0193939	0
LIC20105	DNA binding protein	_	Cytoplasmic Membrane	10	7	-	-	-	-	-	-	-	-	178	COG2207	AraC-type DNA-binding domain-containing proteins	KEGPR	Transcription	Information storage and processing	126	0.00962121	1
LIC20141	Protease HtpX homolog	htpX	Cytoplasmic Membrane	10	4	-	-	-	-	-	-	-	-	294	COG0501	Zn-dependent protease with chaperone function	O	Posttranslational modification, protein turnover, chaperones	Cellular processes and signaling	115	0.00871212	1
LIC20203	Bile acid Na+ symporter	yocS	Cytoplasmic Membrane	10	9	-	-	-	-	-	-	-	-	309	COG0385	Predicted Na+-dependent transporter	R	General function prediction only	Poorly characterized	137	0.0105303	1
LEPIC0277	Hypothetical protein	_	Cytoplasmic	8.96	1	-	-	-	-	-	-	-	-	87	COG4575	Uncharacterized conserved protein	S	Function unknown	Poorly characterized	15	0.00113636	1	193	0.0421212	0	224	0.0443939	0
